# Supplementary material for: Production of acrylic acid from biomass-derived allyl alcohol by selective oxidation using Au/ceria catalysts
Source: Royal Society of Chemistry journal article supplement (doi:10.1039/c5cy02099a), 2015-12-23
Supplement: c5cy02099a1.pdf [file c5cy02099a1.pdf]

**Supporting Information**

**Production of Acrylic Acid from Biomass-Derived Allyl Alcohol  
by Selective Oxidation Using Au/Ceria Catalysts**

Sungpil Yang<sup>a†</sup>, Minsu Kim<sup>b†</sup>, Sungeun Yang<sup>b</sup>, Dae Sung Kim<sup>c</sup>, Won Jae Lee<sup>c</sup>, and Hyunjoo  
Lee<sup>b\*</sup>

<sup>a</sup>Department of Chemical and Biomolecular Engineering, Yonsei University, Seoul 120-749,  
Republic of Korea; <sup>b</sup>Department of Chemical and Biomolecular Engineering, Korea  
Advanced Institute of Science and Technology, Daejeon 305-701, Republic of Korea;  
<sup>c</sup>Corporate R&D, LG Chem Research Park, Daejeon 305-738, Republic of Korea.

Additional Data; Figure S1 ~ Figure S5, Table S1

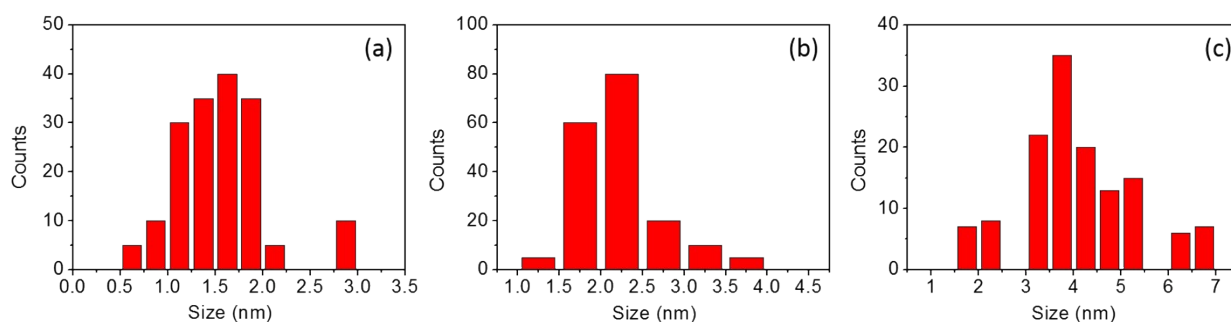

**Figure S1.** Au nanoparticle size distribution for (a) 1.5, (b) 2.2, and (c) 4.1 nm-sized Au/ceria (DP) catalysts.

---

<sup>†</sup> These authors contributed equally.

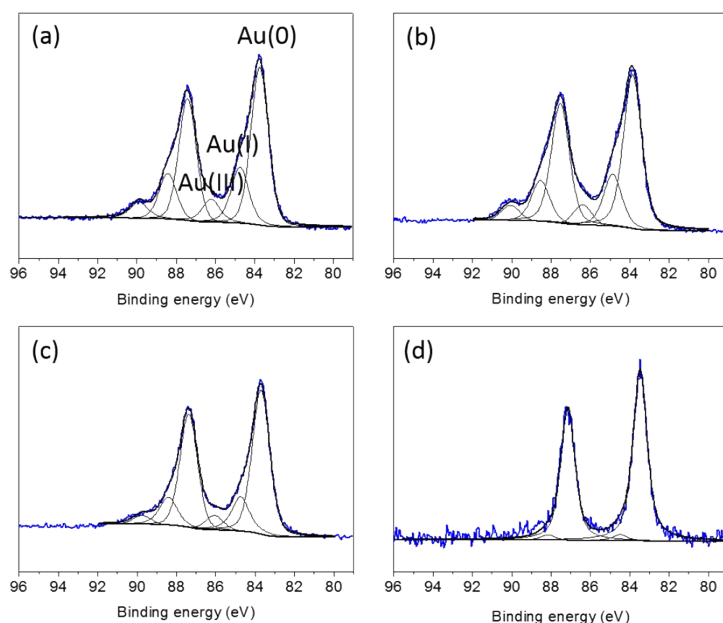

**Figure S2.** XPS data presenting Au 4f peaks for (a) 1.5 nm Au/CeO<sub>2</sub> (DP), (b) 2.2 nm Au/CeO<sub>2</sub> (DP), (c) 4.1 nm Au/CeO<sub>2</sub> (DP), and (d) 2.7 nm Au/CeO<sub>2</sub> (CD).

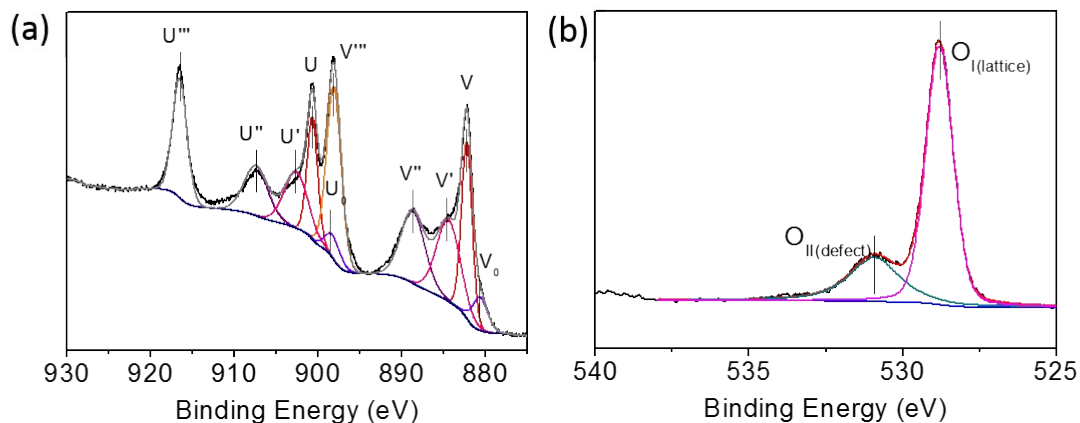

**Figure S3.** XPS data of Au/Ceria (DP) catalysts presenting (a) Ce 3p peaks and (b) O 1s peaks. The ratio of Ce(III) and Ce(IV) was estimated as 19.1% and 80.9% from the ratio of V<sub>0</sub>, V' and V, V'', V''', and the ratio of O<sub>II(defect)</sub> and O<sub>I(lattice)</sub> was estimated as 27.4% and 72.6%, respectively. Tian's work was used for assigning each peak <sup>S1</sup>.

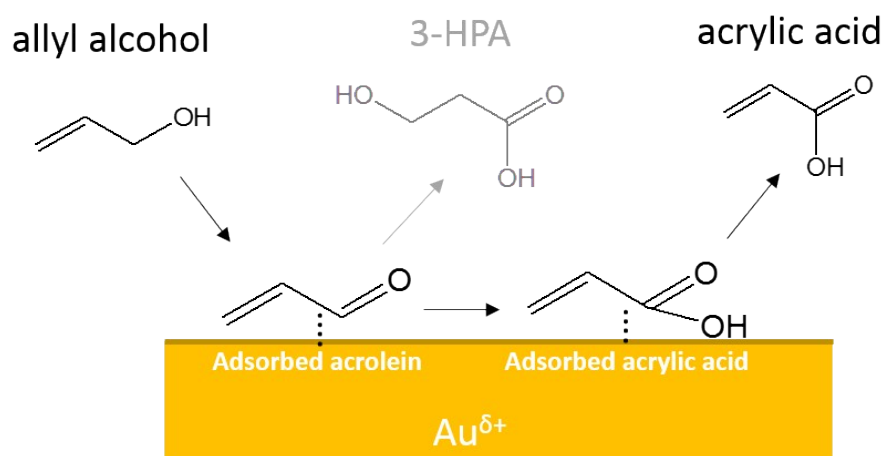

**Figure S4.** Different pathways for the formation of 3-HPA and acrylic acid.

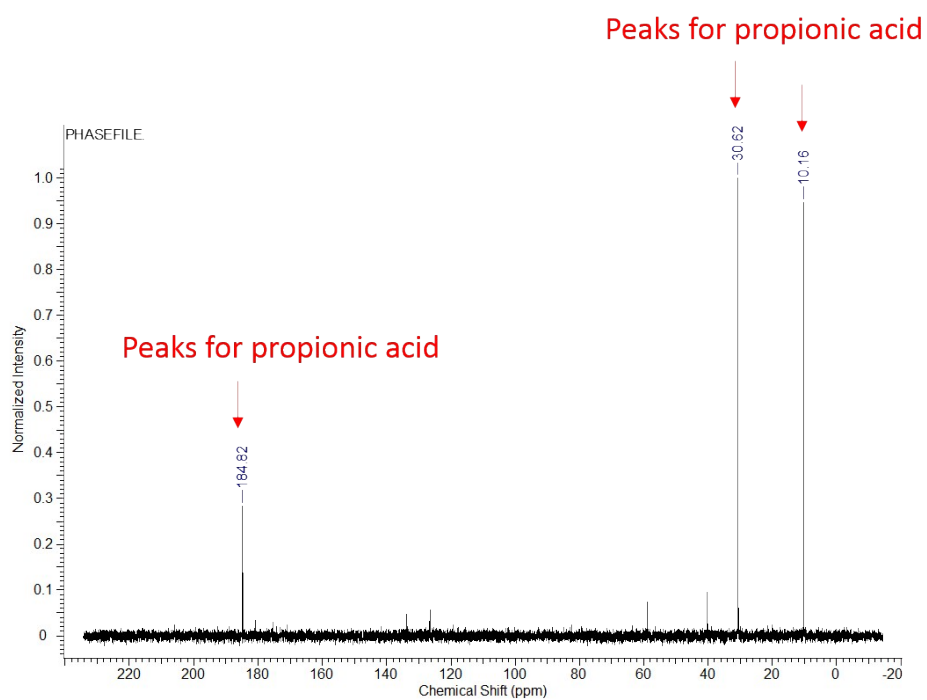

**Figure S5.**  $^{13}\text{C}$  NMR of the product solution after allyl alcohol oxidation using  $\text{Au}_{82.4}\text{Pd}$  /ceria (DP) catalyst. The reaction condition was the same as Au/ceria (DP) catalyst.

**Table S1.** Allyl alcohol oxidation results when Au-M/ceria (DP) catalysts were used.<sup>a</sup>

| Catalyst                                                           | Conv.<br>(%) | Yield(%) |       |                   |       |     |        |
|--------------------------------------------------------------------|--------------|----------|-------|-------------------|-------|-----|--------|
|                                                                    |              | AcA      | 3-HPA | Propionic<br>acid | 3-APA | GA  | Others |
| Au <sub>82.4</sub> Pd <sub>1</sub> /CeO <sub>2</sub> <sup>b</sup>  | 100          | 5.2      | 8.0   | 64.6              | 0     | 0   | 22.2   |
| Au <sub>168.8</sub> Pd <sub>1</sub> /CeO <sub>2</sub> <sup>c</sup> | 100          | 9.9      | 15.3  | 48.3              | 0     | 0   | 26.5   |
| Au <sub>452.8</sub> Pt <sub>1</sub> /CeO <sub>2</sub> <sup>d</sup> | 100          | 35.2     | 27.3  | 11.1              | 2.9   | 0.9 | 19.7   |
| Au <sub>23.6</sub> Cu <sub>1</sub> /CeO <sub>2</sub> <sup>e</sup>  | 94.2         | 35.1     | 27.2  | 7.8               | 2.8   | 0.9 | 23.4   |

<sup>a</sup>The reaction was performed at 50°C, O<sub>2</sub> 3 bar, 12 hrs, 3 M NaOH, and a mole ratio of allyl alcohol/Au was 4000. <sup>b</sup>0.352 μmol or <sup>c</sup>0.176 μmol of PdCl<sub>2</sub> dissolved in 0.2 M of HCl solution was added together with Au precursor. <sup>d</sup>0.587 μmol of H<sub>2</sub>PtCl<sub>6</sub> was added together with Au precursor. <sup>e</sup>0.352 μmol of CuCl<sub>2</sub> was added together with Au precursor. The remaining synthetic procedure was the same as the Au/ceria (DP) catalyst. The actual molar ratio of Au versus secondary metal was measured by ICP-MS after the synthesis.

## References

S1. Z. M. Tian, X. Xiang, L. S. Xie and F. Li, *Ind. Eng. Chem. Res.*, 2013, 52, 288-296.
